# Supplementary material for: Minocycline at 2 Different Dosages vs Placebo for Patients With Mild Alzheimer Disease: A Randomized Clinical Trial
Source: PubMed Central journal article supplement (PMC6865324; doi:10.1001/jamaneurol.2019.3762), 2019-11-18
Supplement: jamaneurol-77-164-s002.pdf [file jamaneurol-77-164-s002.pdf]

## Supplementary Online Content

Howard R, Zubko O, Bradley R, et al; Minocycline in Alzheimer Disease Efficacy (MADE) Trialist Group. Minocycline at 2 different dosages vs placebo for patients with mild alzheimer disease: a randomized clinical trial. *JAMA Neurol*. Published online November 18, 2019. doi:10.1001/jamaneurol.2019.3762

**eTable 1.** Follow-up Rates for sMMSE and BADLS by Treatment Allocation and Follow-up Period

**eTable 2.** Reasons for Failed Screens Into MADE Trial

**eTable 3.** Causes of Death

**eTable 4.** Baseline Characteristics of Those Who Stopped MADE Treatment

**eTable 5A.** Line by Line Listings of Serious Adverse Events (SAEs) Categorised

**eTable 5B.** Serious Adverse Events Categorised by Treatment Allocation and Whether on Treatment (IMP)

**eFigure 1.** Flow Chart: Follow-up Completeness Over Time

**eFigure 2.** Change in sMMSE From Baseline to Month 24 (A) Using Imputation Method (1) and (B) Using Imputation Method (2) to Estimate Scores for Patients With No Follow-up Past Baseline

**eFigure 3.** Change in BADLS From Baseline to Month 24 (A) Using Imputation Method (1) and (B) Using Imputation Method (2) to Estimate Scores for Patients With No Follow-up Past Baseline

**eFigure 4.** Subgroup Analyses of Change in sMMSE Over 24 Months for Minocycline (Any Dose) Versus Placebo by Baseline Characteristics

**eFigure 5.** Probability of (A) Survival, (B) Remaining Community Resident and (C) Being Alive and Community-Resident by Treatment Allocation: Kaplan-Meier Survival Plots

**eFigure 6.** Average Decline of sMMSE Split by Baseline sMMSE Score of 24-26 or 27-30

This supplementary material has been provided by the authors to give readers additional information about their work.

**eTable 1. Follow-up rates for sMMSE and BADLS by treatment allocation and follow-up period**

|                  |                | sMMSE      |            |             | BADLS      |            |             |
|------------------|----------------|------------|------------|-------------|------------|------------|-------------|
|                  |                | Received   | Expected*  | %           | Received   | Expected** | %           |
| <b>Screening</b> | <b>400mg</b>   | 183        | 184        | <b>99.5</b> | 183        | 184        | <b>99.5</b> |
|                  | <b>200mg</b>   | 181        | 181        | <b>100</b>  | 181        | 181        | <b>100</b>  |
|                  | <b>Placebo</b> | 178        | 179        | <b>99.4</b> | 177        | 178        | <b>99.4</b> |
|                  | <b>Total</b>   | <b>542</b> | <b>544</b> | <b>99.6</b> | <b>541</b> | <b>543</b> | <b>99.6</b> |
| <b>6 Month</b>   | <b>400mg</b>   | 159        | 184        | <b>86</b>   | 159        | 184        | <b>86</b>   |
|                  | <b>200mg</b>   | 172        | 181        | <b>95</b>   | 172        | 181        | <b>95</b>   |
|                  | <b>Placebo</b> | 167        | 179        | <b>93</b>   | 164        | 176        | <b>93</b>   |
|                  | <b>Total</b>   | <b>498</b> | <b>544</b> | <b>92</b>   | <b>495</b> | <b>541</b> | <b>91</b>   |
| <b>12 Month</b>  | <b>400mg</b>   | 139        | 181        | <b>77</b>   | 140        | 180        | <b>78</b>   |
|                  | <b>200mg</b>   | 158        | 180        | <b>88</b>   | 157        | 178        | <b>88</b>   |
|                  | <b>Placebo</b> | 156        | 176        | <b>89</b>   | 155        | 171        | <b>91</b>   |
|                  | <b>Total</b>   | 453        | 537        | <b>84</b>   | 452        | 529        | <b>85</b>   |
| <b>18 Month</b>  | <b>400mg</b>   | 127        | 179        | <b>71</b>   | 128        | 178        | <b>72</b>   |
|                  | <b>200mg</b>   | 146        | 177        | <b>82</b>   | 146        | 169        | <b>86</b>   |
|                  | <b>Placebo</b> | 147        | 172        | <b>85</b>   | 148        | 167        | <b>89</b>   |
|                  | <b>Total</b>   | <b>420</b> | <b>528</b> | <b>80</b>   | <b>422</b> | <b>514</b> | <b>82</b>   |
| <b>24 Month</b>  | <b>400mg</b>   | 119        | 174        | <b>68</b>   | 118        | 170        | <b>69</b>   |
|                  | <b>200mg</b>   | 144        | 176        | <b>82</b>   | 142        | 167        | <b>85</b>   |
|                  | <b>Placebo</b> | 140        | 167        | <b>84</b>   | 137        | 154        | <b>89</b>   |
|                  | <b>Total</b>   | <b>403</b> | <b>517</b> | <b>78</b>   | <b>397</b> | <b>491</b> | <b>81</b>   |

\* Expected numbers of sMMSE assessments exclude those who withdrew prior to starting treatment – i.e., those not effectively randomised – and those who died prior to the assessment

\*\* Expected numbers of BADLS\* assessments also exclude those who were admitted to care

**eTable 2. Reasons for failed screens into MADE trial**

| <b>Reason for failed screen</b>                         | <b>Number of participants</b> |
|---------------------------------------------------------|-------------------------------|
| <b>Ineligible</b>                                       |                               |
| In another trial                                        | 7                             |
| Dementia diagnosis retracted due to lack of progression | 7                             |
| No carer/study partner                                  | 8                             |
| Failed sMMSE                                            | 66                            |
| Lacks capacity/understanding                            | 12                            |
| Allergies to antibiotic                                 | 2                             |
| eGFR too low                                            | 29                            |
| Blood test results ineligible                           | 9                             |
| Physically too impaired to participate                  | 8                             |
| Other conditions (e.g. cancer, mental health)           | 15                            |
| Patient in care                                         | 1                             |
| Not eligible for other reason                           | 1                             |
| <b>Subtotal ineligible</b>                              | <b>165</b>                    |
| <b>Patient/ carer decision</b>                          |                               |
| Don't want any more medication                          | 23                            |
| Patient doesn't want to take part – no reason given     | 60                            |
| Family reluctant                                        | 3                             |
| Don't want extra pressure/burden                        | 4                             |
| Patient believes underlying physical problem            | 1                             |
| Feels dementia is not severe enough yet                 | 2                             |
| Concerned about side effects                            | 4                             |
| Still working, too busy                                 | 1                             |
| Study too long                                          | 1                             |
| <b>Subtotal Patient/ carer decision</b>                 | <b>99</b>                     |
| <b>Other</b>                                            |                               |
| Moving out of area                                      | 1                             |
| Clinician refused to allow patient approach             | 1                             |
| Noncompliant with meds                                  | 1                             |
| Unable to contact again                                 | 10                            |
| <b>Subtotal other</b>                                   | <b>13</b>                     |
| <b>Unknown</b>                                          | <b>55</b>                     |
|                                                         |                               |
| <b>Total number of failed screens</b>                   | <b>332</b>                    |
| <b>Total screened</b>                                   | <b>886</b>                    |
| <b>Total recruited</b>                                  | <b>554</b>                    |

### eFigure 1. Flow chart: follow up completeness over time

Colour coding to show assessments split by treatment: red is 400mg, blue is 200mg and green is placebo.

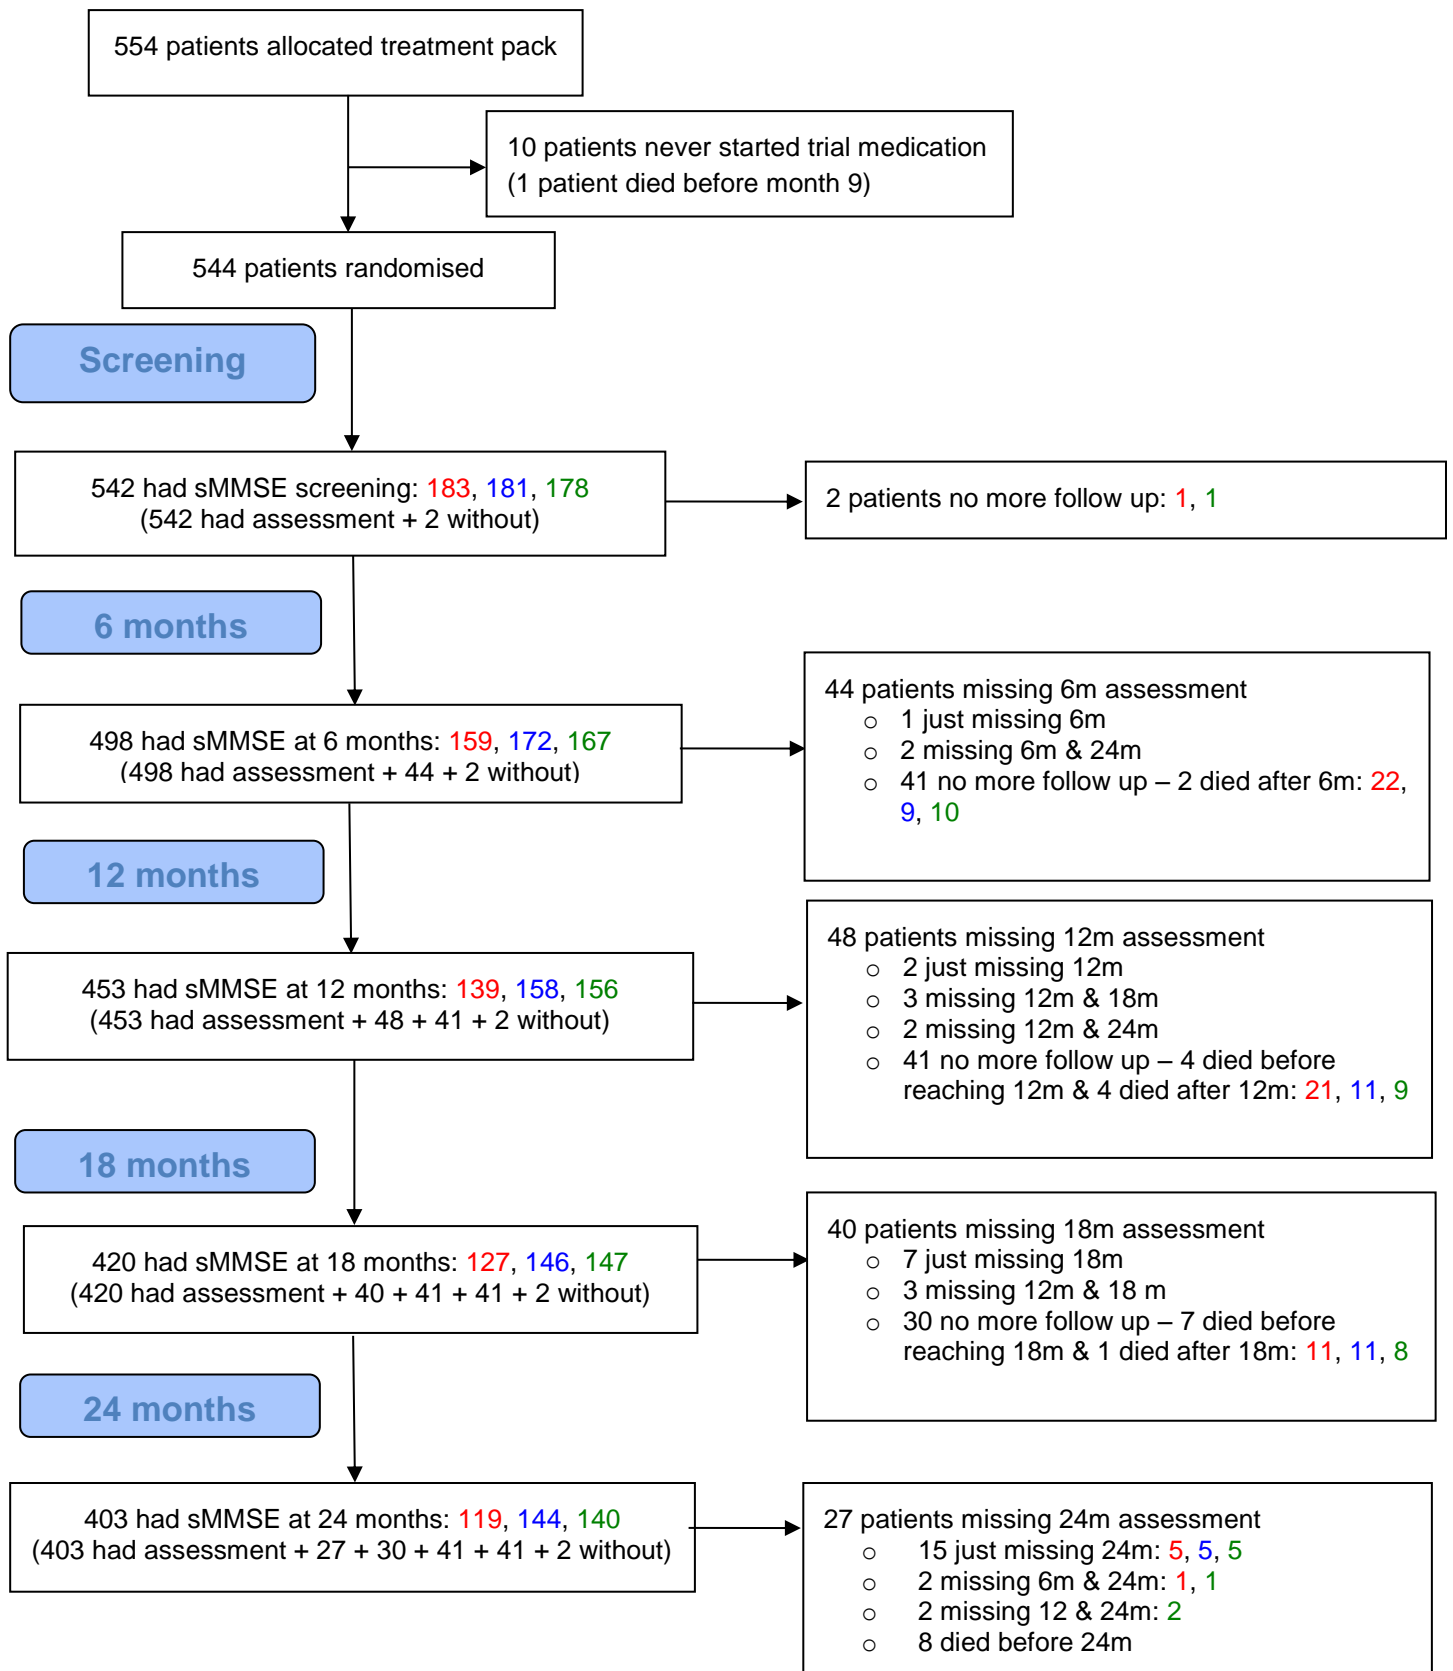

**eTable 3. Causes of death**

| Treatment               | Cause of death                                | Weeks until death | Stopped treatment ≥28 days previously? |
|-------------------------|-----------------------------------------------|-------------------|----------------------------------------|
| <b>Infection</b>        |                                               |                   |                                        |
| Placebo                 | Infection                                     | 64                | Yes, 17 weeks                          |
| Placebo                 | Pneumonia                                     | 36                | No                                     |
| Placebo                 | Pneumonia and pulmonary oedema                | 28                | Yes, 23 weeks                          |
| Placebo                 | Pneumonia                                     | 66                | No                                     |
| Placebo                 | Chest infection                               | 83                | No                                     |
| 200mg                   | Pneumonia                                     | 56                | No                                     |
| 400mg                   | Pneumonia                                     | 86                | Yes, 2 weeks                           |
| <b>Neuropsychiatric</b> |                                               |                   |                                        |
| Placebo                 | Dementia                                      | 95                | No                                     |
| Placebo                 | Alzheimer's/Lewy Body Dementia                | 92                | Yes, 87 weeks                          |
| 400mg                   | Progression of Alzheimer's                    | 58                | Yes, 7 weeks                           |
| <b>Cardiovascular</b>   |                                               |                   |                                        |
| Placebo                 | Myocardial infarction                         | 102               | No                                     |
| Placebo                 | Myocardial infarction                         | 72                | No                                     |
| Placebo                 | Heart attack                                  | 64                | No                                     |
| 200mg                   | Cardiac event                                 | 50                | No                                     |
| 200mg                   | Heart attack                                  | 58                | Yes, 51 weeks                          |
| 400mg                   | Heart attack                                  | 37                | No                                     |
| 400mg                   | Heart failure                                 | 100               | Yes, 88 weeks                          |
| 400mg                   | Heart attack                                  | 91                | No                                     |
| <b>Cerebrovascular</b>  |                                               |                   |                                        |
| 200mg                   | Unknown (stroke on 21/03/17)                  | 103               | Yes, 84 weeks                          |
| 400mg                   | CVA                                           | 42                | Yes, 3 weeks                           |
| 400mg                   | Stroke                                        | 36                | No                                     |
| <b>Renal failure</b>    |                                               |                   |                                        |
| Placebo                 | Chronic renal failure                         | 32                | Yes, 12 weeks                          |
| 400mg                   | Lung and kidney failure                       | 103               | Yes, 1 week                            |
| <b>Other cause</b>      |                                               |                   |                                        |
| Placebo                 | Complications after bowel surgery             | 89                | Yes, 44 weeks                          |
| 200mg                   | General health decline                        | 56                | Yes, 29 weeks                          |
| 200mg                   | Large abdominal tumour causing kidney failure | 28                | Never started                          |
| 400mg                   | COPD                                          | 57                | Yes, 11 weeks                          |
| <b>Unknown</b>          |                                               |                   |                                        |
| 400mg                   | Unknown                                       | 77                | Yes, 17 weeks                          |

**eFigure 2. Change in sMMSE from baseline to month 24 (A) using imputation method (1) and (B) using imputation method (2) to estimate scores for patients with no follow-up past baseline.** Graph shows change in mean sMMSE scores with standard errors. Baseline scores\* are set to zero. p-values are from tests for time-by-treatment interaction from repeated measures analysis. Results from ITT analysis N=554.

(2A) Imputation 1

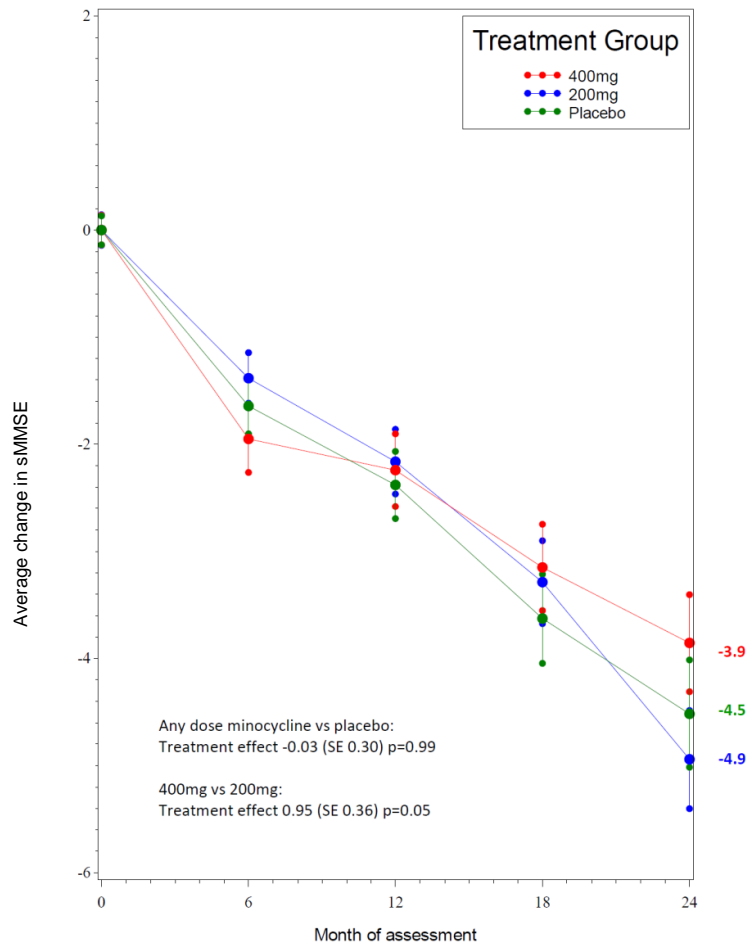

(2B) Imputation 2

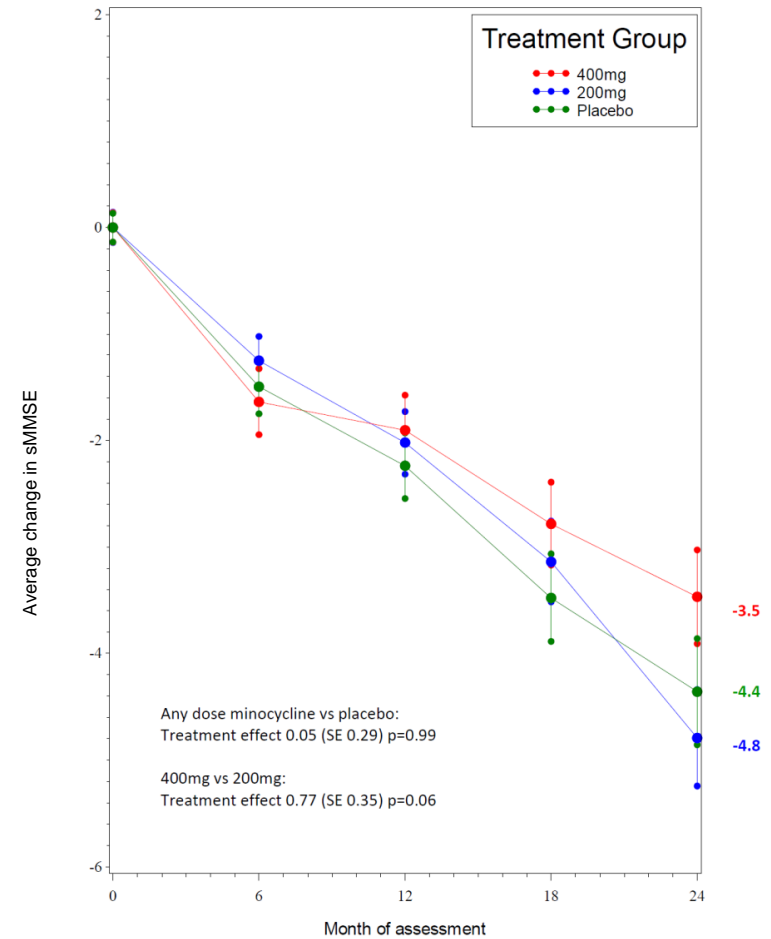

\*Baseline scores: 400mg 26.3, 200mg 26.5, placebo 26.4

**eFigure 3. Change in BADLS from baseline to month 24 (A) using imputation method (1) and (B) using imputation method (2) to estimate scores for patients with no follow-up past baseline.** Graph shows change in mean BADLS scores with standard errors. Baseline scores\* are set to zero. p-values are from tests for time-by-treatment interaction from repeated measures analysis. Results from ITT analysis N=554.

(2A) Imputation 1

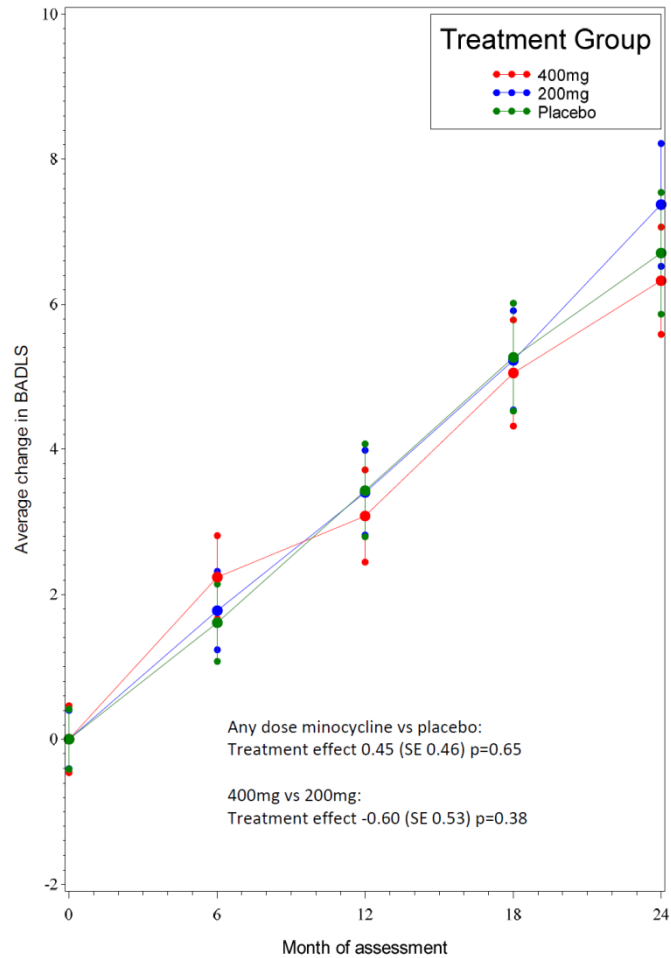

(2B) Imputation 2

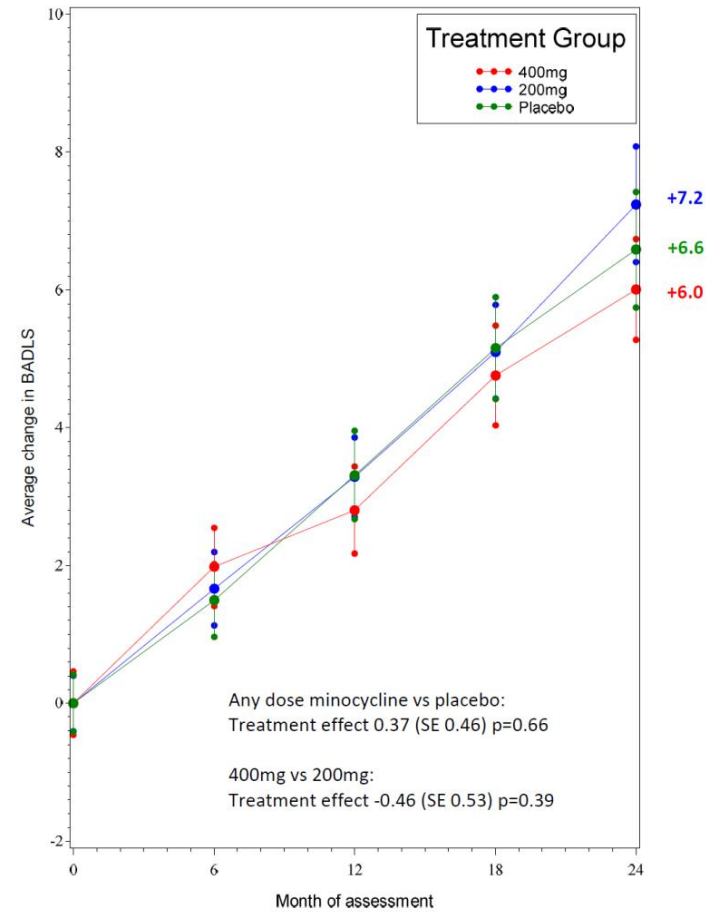

\*Baseline scores: 400mg 5.6, 200mg 4.9, placebo 5.5

**eFigure 4. Subgroup analyses of change in sMMSE over 24 months for minocycline (any dose) versus placebo by baseline characteristics:** duration of symptoms, baseline sMMSE, age and gender. Results are derived from a repeated measures model, with p-values from tests for interaction between treatment and the selected subgroup.

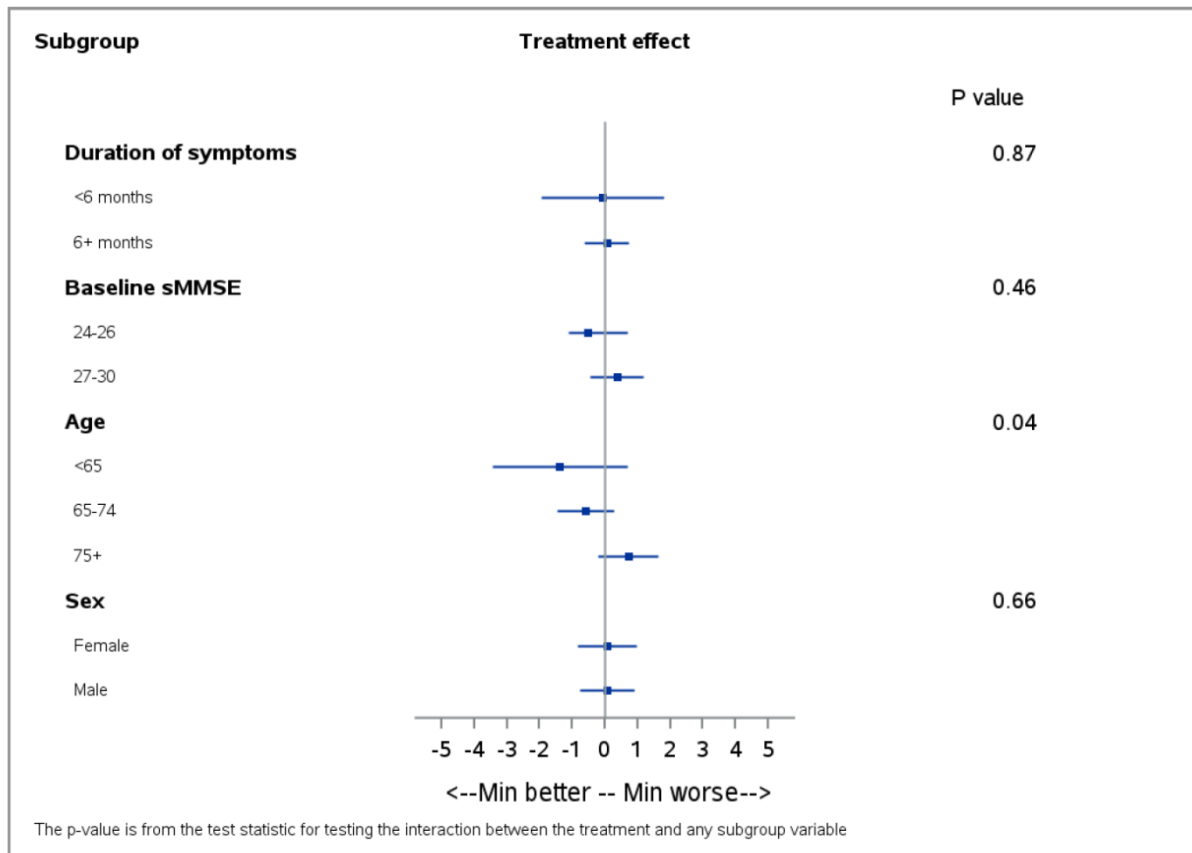



**eFigure 5. Probability of A) Survival, (B) remaining community resident and (C) being alive and community-resident by treatment allocation: Kaplan-Meier survival plots**

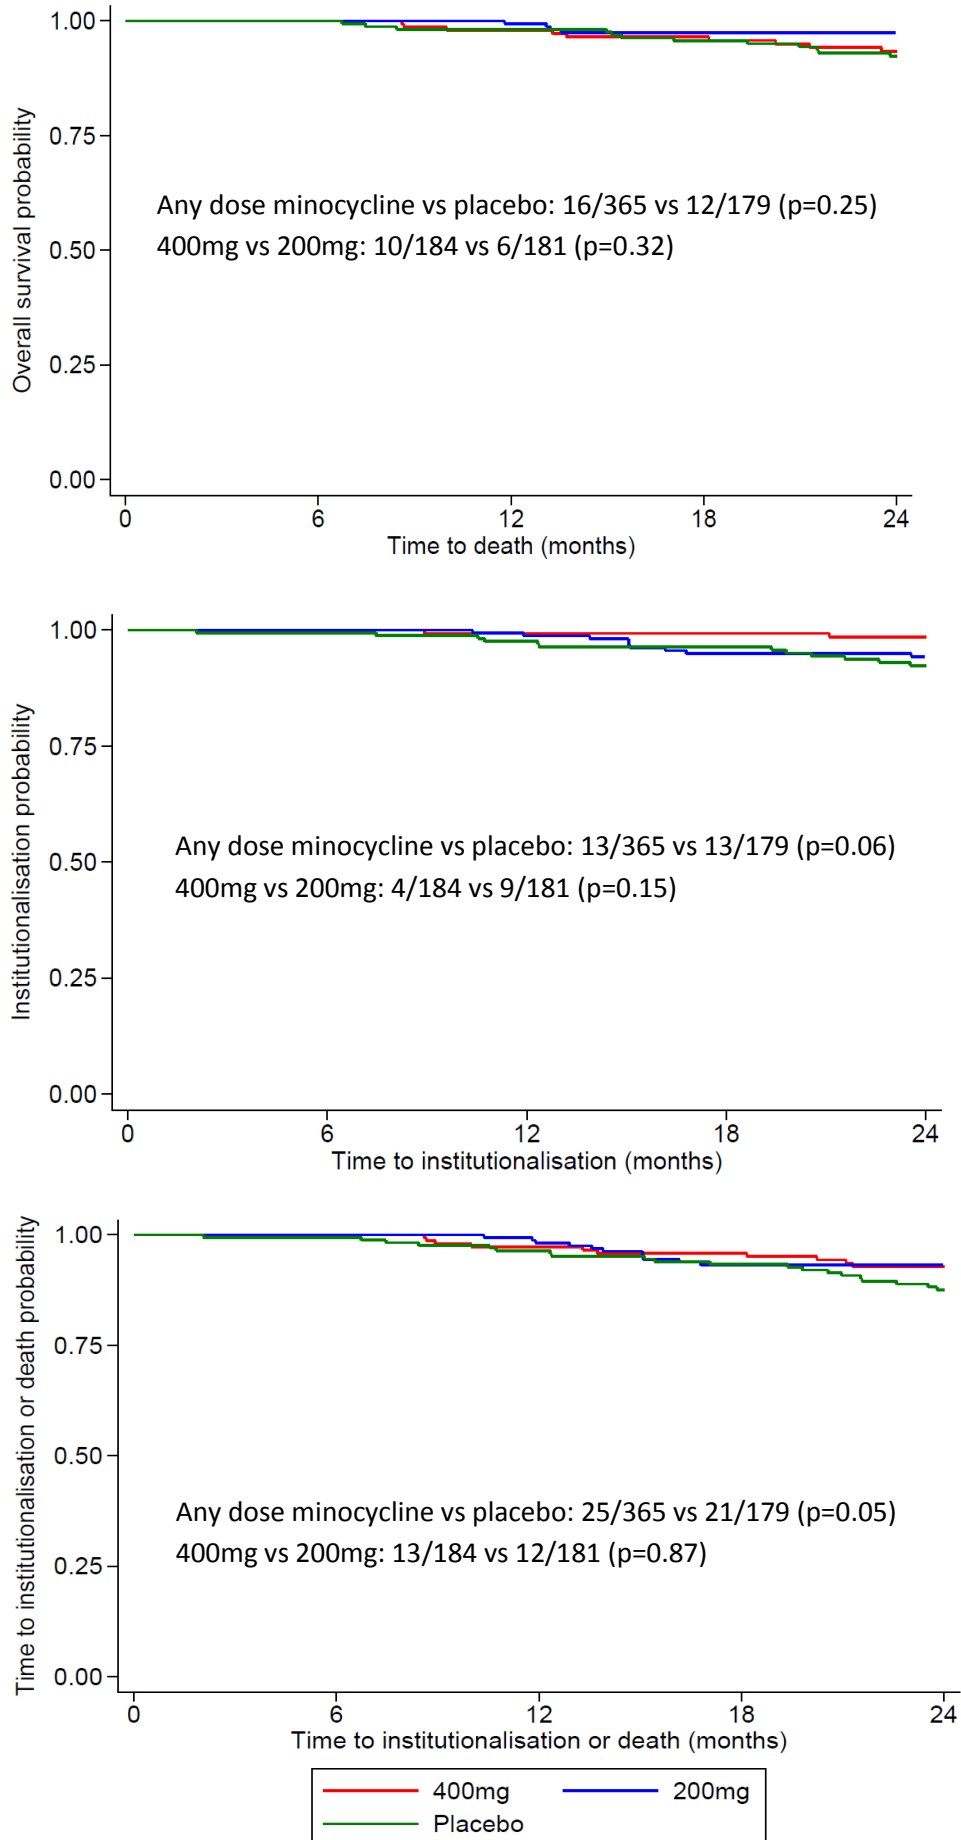

eFigure 6. Average decline of sMMSE split by baseline sMMSE score of 24-26 or 27-30\*

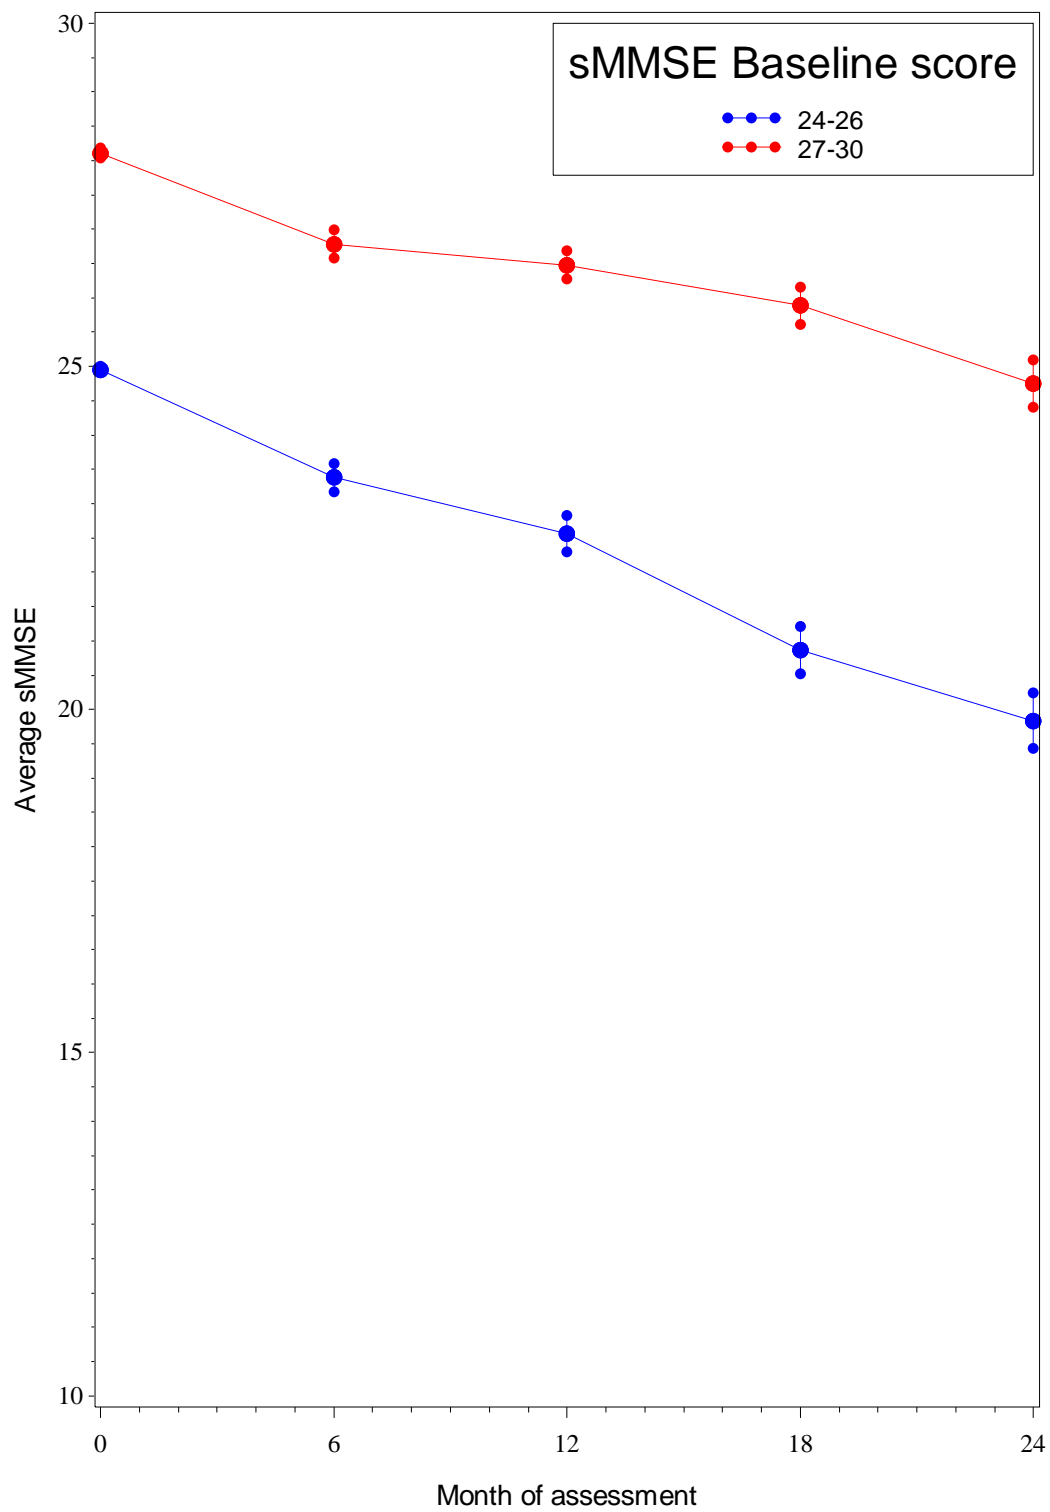

\* 8 patients start with an sMMSE of 30 and have a 24 month sMMSE of 30

**eTable 4. Baseline characteristics of those who stopped MADE treatment.** Data are n (%).

| Baseline characteristics |                   | 400mg<br>(n=184) | 200mg<br>(n=181) | Placebo<br>(n=179) | Total<br>(n=544) |
|--------------------------|-------------------|------------------|------------------|--------------------|------------------|
| Age                      | <65 (n=65)        | 15 (23.1%)       | 7 (10.8%)        | 6 (9.2%)           | 28 (43.1%)       |
|                          | 65-74 (n=200)     | 45 (22.5%)       | 23 (11.5%)       | 19 (9.5%)          | 87 (43.5%)       |
|                          | 75+ (n=279)       | 68 (24.4%)       | 36 (12.9%)       | 35 (12.5%)         | 139 (49.8%)      |
| Gender                   | Female (n=241)    | 56 (23.2%)       | 36 (14.9%)       | 27 (11.2%)         | 119 (49.4%)      |
|                          | Male (n=303)      | 72 (23.8%)       | 30 (9.9%)        | 33 (10.9%)         | 135 (44.6%)      |
| Duration of symptoms     | <6 months (60)    | 14 (23.3%)       | 8 (13.3%)        | 7 (11.7%)          | 29 (48.3%)       |
|                          | 6+ months (n=484) | 114 (23.6%)      | 58 (12.0%)       | 53 (11.0%)         | 225 (46.5%)      |

**eTable 5A. Line by line listings of Serious Adverse Events (SAEs) categorised\***

| Reference Number        | Event                                                                                                                             | On treatment?           |
|-------------------------|-----------------------------------------------------------------------------------------------------------------------------------|-------------------------|
| <b>Gastrointestinal</b> |                                                                                                                                   |                         |
| SAE031                  | Gastroenteritis                                                                                                                   | Yes                     |
| SAE067                  | Constipation. Was taken to hospital, pt described medication.                                                                     | Yes                     |
| SAE064                  | Gastroenteritis                                                                                                                   | Yes                     |
| SAE077                  | Sigmoid volvulus with faecal impaction                                                                                            | Stopped >28 days ago    |
| SAE075                  | Diverticulitis and impacted bowel                                                                                                 | Yes                     |
| SAE087                  | Deranged LFTs/stomach ulcer with gastrointestinal bleed                                                                           | Yes (stopped same time) |
| SAE149                  | Abdominal distension pain                                                                                                         | Stopped >28 days ago    |
| SAE091                  | Constipation. Admitted to hospital with sickness/stomach pains.                                                                   | Stopped <28 days ago    |
| SAE095                  | Gradual internal bleeding of the stomach lining                                                                                   | Yes                     |
| SAE092                  | Diarrhoea and vomiting, and weight loss. Ambulance called and pt was admitted to hospital overnight. Hospital requested RNI scan. | Yes                     |
| SAE106                  | Under investigation – severe diarrhoea. Bowels going into spasms.                                                                 | Yes                     |
| SAE112                  | Patient admitted to hospital with severe abdominal pains                                                                          | Stopped >28 days ago    |
| SAE120                  | Undiagnosed stomach pains. Investigations into possible stomach ulcer or reoccurrence of bowel cancer                             | Yes (stopped same time) |
| SAE138                  | Diverticulitis                                                                                                                    | Yes                     |
| SAE181                  | Gastroenteritis                                                                                                                   | Yes                     |
| SAE164                  | Appendicitis                                                                                                                      | Yes                     |
| SAE187                  | Death from complications after bowel surgery                                                                                      | Stopped >28 days ago    |
| SAE209                  | Secondary, adhesion bowel obstruction – resulted in death                                                                         | Stopped >28 days ago    |
| SAE194                  | Bowel obstruction                                                                                                                 | Yes                     |
| SAE182                  | Cyst on small intestine updated diagnosis previously bowel obstruction                                                            | Yes                     |
| SAE228                  | Obstruction of the common bile duct                                                                                               | Yes                     |
| <b>Respiratory</b>      |                                                                                                                                   |                         |
| SAE001                  | Pneumonia                                                                                                                         | Yes (stopped same time) |
| SAE002                  | Wheezing and shortness of breath                                                                                                  | Yes (stopped same time) |
| SAE012                  | COPD                                                                                                                              | Yes                     |
| SAE020                  | Pneumonia                                                                                                                         | Yes                     |
| SAE018                  | Pneumonia – resulted in death                                                                                                     | Yes (stopped same time) |
| SAE022                  | Suicide attempt and subsequent aspiration pneumonia and pulmonary oedema – resulted in death                                      | Stopped >28 days ago    |
| SAE025                  | Community acquired pneumonia                                                                                                      | Yes (stopped same time) |
| SAE048                  | Sepsis secondary to community acquired pneumonia                                                                                  | Yes (stopped same time) |
| SAE043                  | Pneumonia                                                                                                                         | Yes                     |
| SAE047                  | Suspected pneumonia/further investigation                                                                                         | Yes                     |
| SAE079                  | Pneumonia and pleural effusion – resulted in death                                                                                | Yes                     |
| SAE085                  | Pneumonia                                                                                                                         | Yes (stopped same time) |
| SAE116                  | Died – COPD                                                                                                                       | Stopped >28 days ago    |
| SAE114                  | Pneumonia – died in hospital                                                                                                      | Yes (stopped same time) |
| SAE117                  | Pneumonia preceded by declining neutrophil count which then rose before ceasing IMP                                               | Yes                     |
| SAE136                  | Community acquired pneumonia                                                                                                      | Yes                     |
| SAE122                  | Pneumonia                                                                                                                         | Yes                     |
| SAE156                  | Increased shortness of breath                                                                                                     | Stopped <28 days ago    |
| SAE163                  | Breathlessness & extreme thirst                                                                                                   | Yes                     |
| SAE184                  | Pneumonia                                                                                                                         | Yes                     |
| SAE200                  | Chronic obstructive pulmonary disease                                                                                             | Yes                     |
| SAE226                  | Admitted to hospital after fall contracted pneumonia while in hospital                                                            | Yes                     |
| SAE266                  | Admitted to hospital after fall & contracted pneumonia while in hospital. Had fractured rib                                       | Yes                     |

|                                |                                                                                                                      |                         |
|--------------------------------|----------------------------------------------------------------------------------------------------------------------|-------------------------|
| SAE243                         | Pneumonia                                                                                                            | Stopped >28 days ago    |
| SAE270                         | Pulmonary fibrosis                                                                                                   | Yes                     |
| SAE215                         | Pneumonia – resulted in death                                                                                        | Stopped >28 days ago    |
| <b>Mechanical injury</b>       |                                                                                                                      |                         |
| SAE004                         | Fall resulting in skull fracture                                                                                     | Yes                     |
| SAE015                         | Fall and closed fracture of rib                                                                                      | Yes (stopped same time) |
| SAE021                         | Fall out of bed resulting in head and neck injury                                                                    | Stopped <28 days ago    |
| SAE034                         | Fall sustaining cuts, bruising and reduced mobility                                                                  | Yes                     |
| SAE053                         | Unwitnessed fall out of bed                                                                                          | Yes                     |
| SAE068                         | Fractures pubic rami after a fall                                                                                    | Yes                     |
| SAE046                         | Fracture of right femur from a fall                                                                                  | Yes (stopped same time) |
| SAE054                         | Fractured wrist from a fall                                                                                          | Yes                     |
| SAE080                         | Patient fell and fractured pelvis, related to increased dizziness, less steady on feet since starting MADE treatment | Stopped <28 days ago    |
| SAE063                         | Possible bruised, cracked or broken ribs following a fall due to tripping                                            | Yes                     |
| SAE073                         | Shoulder surgery following fall and dislocation                                                                      | Yes                     |
| SAE065                         | Fracture right humerus from a fall                                                                                   | Yes                     |
| SAE093                         | Cerebral concussion and cut to head from a fall                                                                      | Yes                     |
| SAE124                         | Fractured right neck of femur                                                                                        | Yes (stopped same time) |
| SAE155                         | Road traffic accident – patient hit by car                                                                           | Stopped >28 days ago    |
| SAE119                         | Fall and admission to hospital overnight                                                                             | Yes                     |
| SAE139                         | Fractured left femur and underwent left hemiarthroplasty                                                             | Yes                     |
| SAE175                         | Fractured ribs from a fall                                                                                           | Yes                     |
| SAE117                         | Broken left hip                                                                                                      | Yes                     |
| SAE196                         | Fracture of left neck of femur                                                                                       | Yes                     |
| SAE199                         | Knee replacement operation                                                                                           | Yes                     |
| SAE222                         | Fall                                                                                                                 | Yes                     |
| SAE232                         | Fracture of metacarpal                                                                                               | Yes                     |
| SAE235                         | Facial injury from fall                                                                                              | Stopped >28 days ago    |
| SAE237                         | Collapse & facial injury and nasal fracture                                                                          | Yes                     |
| SAE254                         | Fractured hip                                                                                                        | Yes                     |
| SAE255                         | Fall causing pubic ramus and wrist fracture                                                                          | Yes                     |
| SAE258                         | Vertigo/dizziness – leading to head injury from a fall                                                               | Stopped >28 days ago    |
| SAE256                         | Fracture to middle finger and left hand                                                                              | Yes                     |
| SAE263                         | Mechanical fall and back pain                                                                                        | Stopped >28 days ago    |
| <b>Endocrine and metabolic</b> |                                                                                                                      |                         |
| SAE008                         | Diabetes mellitus management impairment – resolved                                                                   | Yes                     |
| SAE007                         | New medical diagnosis of type 2 diabetes                                                                             | Yes                     |
| SAE060                         | Low sodium levels                                                                                                    | Yes                     |
| SAE061                         | Pituitary adenoma                                                                                                    | Stopped >28 days ago    |
| SAE056                         | Diabetes ketoacidosis                                                                                                | Stopped >28 days ago    |
| SAE072                         | Hypoglycaemia                                                                                                        | Stopped >28 days ago    |
| SAE118                         | Hypoglycaemia                                                                                                        | Yes                     |
| SAE132                         | Syndrome of inappropriate antidiuretic hormone (SIADH)                                                               | Yes                     |
| SAE135                         | Low potassium due to bowel preparation for CT bowel                                                                  | Yes                     |
| SAE189                         | Admitted to hospital after feeling weak and faint. Diagnosed with low sodium levels                                  | Yes                     |
| SAE190                         | Admitted to hospital following low sodium levels and generally feeling weak                                          | Yes                     |
| SAE249                         | Inflammatory arthropathy – likely due to gout                                                                        | Yes                     |
| <b>Cancer</b>                  |                                                                                                                      |                         |
| SAE005                         | Reoccurrence of bladder cancer                                                                                       | Yes                     |
| SAE032                         | Tumour on kidney – right kidney/part of liver removed                                                                | Yes                     |
| SAE024                         | Colon cancer                                                                                                         | Yes                     |
| SAE040                         | Colon cancer (open anterior resection surgery)                                                                       | Yes                     |
| SAE066                         | Chronic lymphocytic leukaemia                                                                                        | Yes                     |
| SAE096                         | Diagnosis of myeloproliferative neoplasm JAK-1                                                                       | Yes                     |
| SAE078                         | Working diagnosis – colon cancer. Pt feels well so pt/family don't want further tests                                | Yes                     |

|                                  |                                                                                                                     |                         |
|----------------------------------|---------------------------------------------------------------------------------------------------------------------|-------------------------|
| SAE083                           | Bowel cancer – resulted in death                                                                                    | Yes                     |
| SAE011                           | Cancer of oesophagus                                                                                                | Stopped >28 days ago    |
| SAE123                           | Suspected kidney cancer, diagnosis of left renal tumour                                                             | Stopped >28 days ago    |
| SAE229                           | Chronic lymphoid leukaemia                                                                                          | Stopped >28 days ago    |
| SAE102                           | Recent lung cancer diagnosis. Further investigation of cancer shows it to be terminal with secondary's in the liver | Yes                     |
| SAE109                           | Bowen's disease                                                                                                     | Yes                     |
| SAE183                           | Myelodysplastic syndrome (MDS)                                                                                      | Yes                     |
| SAE147                           | Bowel cancer                                                                                                        | Stopped >28 days ago    |
| SAE130                           | Probable lung cancer, won't undergo treatment for cancer                                                            | Stopped >28 days ago    |
| SAE142                           | Patient diagnosed with prostate cancer                                                                              | Yes                     |
| SAE161                           | Prostate cancer with pelvic metastasis                                                                              | Yes                     |
| SAE191                           | Colonic primary tumour, with extensive liver metastasis                                                             | Stopped <28 days ago    |
| SAE193                           | Complex atypical hyperplasia                                                                                        | Yes (stopped same time) |
| SAE206                           | Lung tumour and secondary cancers                                                                                   | Yes                     |
| SAE212                           | Appearances consistent with lung malignancy. Given co-morbid condition for best supportive/palliative care          | Yes                     |
| SAE217                           | Vulvar cancer                                                                                                       | Yes                     |
| SAE238                           | Tonsillectomy due to cancer                                                                                         | Yes                     |
| SAE251                           | Prostate cancer                                                                                                     | Stopped >28 days ago    |
| SAE253                           | Basal cell carcinoma                                                                                                | Yes                     |
| <b>Haematological/thrombosis</b> |                                                                                                                     |                         |
| SAE038                           | Low platelets                                                                                                       | Yes (stopped same time) |
| SAE045                           | Blood transfusion for suspected bleed, following low haemoglobin                                                    | Yes                     |
| SAE110                           | DVT                                                                                                                 | Yes (stopped same time) |
| SAE129                           | Neutropenia                                                                                                         | Yes                     |
| SAE145                           | Anaemia                                                                                                             | Yes                     |
| SAE236                           | Blood clot                                                                                                          | Yes                     |
| <b>Dermatological</b>            |                                                                                                                     |                         |
| SAE245                           | Minocycline type 2 pigmentation on face                                                                             | Yes                     |
| <b>Neuropsychiatric</b>          |                                                                                                                     |                         |
| SAE009                           | Hospitalisation following seizures                                                                                  | Yes                     |
| SAE019                           | Psychosis secondary to dementia. Also mild UTI                                                                      | Yes (stopped same time) |
| SAE029                           | Admitted to psychiatric unit following relapse in psychotic symptoms with agitation                                 | Stopped >28 days ago    |
| SAE128                           | Patient confused, lacked coordination and had been experiencing more falls for a few weeks                          | Yes                     |
| SAE160                           | Hospital admission with severe Alzheimer's dementia with significant behavioural disturbance                        | Stopped >28 days ago    |
| SAE050                           | Admission to hospital due to loss of consciousness                                                                  | Yes                     |
| SAE158                           | Death due to dementia                                                                                               | Yes                     |
| SAE016                           | Subdural haematoma                                                                                                  | Yes (stopped same time) |
| SAE152                           | Alzheimer's disease/Lewy body disease – resulted in death                                                           | Stopped <28 days ago    |
| SAE143                           | Stroke                                                                                                              | Yes (stopped same time) |
| SAE105                           | Probable stroke. Also receiving treatment for chest infection                                                       | Yes (stopped same time) |
| SAE055                           | Minor stroke                                                                                                        | Yes                     |
| SAE146                           | Seizure (known epilepsy), cracked bone in ankle                                                                     | Yes                     |
| SAE086                           | CVA – resulted in death                                                                                             | Stopped >28 days ago    |
| SAE170                           | Alzheimer's disease                                                                                                 | Yes                     |
| SAE076                           | Alzheimer's disease                                                                                                 | Yes                     |
| SAE203                           | Minor stroke non haemorrhagic                                                                                       | Yes                     |
| SAE069                           | Stroke                                                                                                              | Yes                     |

|                           |                                                                                                                                    |                         |
|---------------------------|------------------------------------------------------------------------------------------------------------------------------------|-------------------------|
| SAE059                    | Left intra-cranial bleed                                                                                                           | Yes (stopped same time) |
| SAE154                    | Alzheimer's disease                                                                                                                | Yes                     |
| SAE166                    | Funny turns followed by suspected TIA. Patient hospitalised                                                                        | Stopped >28 days ago    |
| SAE150                    | Stroke                                                                                                                             | Yes                     |
| SAE167                    | Bleeding on brain                                                                                                                  | Yes                     |
| SAE159                    | Mini stroke (TIA)                                                                                                                  | Yes                     |
| SAE169                    | Suspected stroke/seizure                                                                                                           | Yes                     |
| SAE172                    | Stroke – resulted in death                                                                                                         | Yes                     |
| SAE088                    | Small left frontal lobe cortical haemorrhage                                                                                       | Yes                     |
| SAE153                    | Subdural haemorrhage/blood clot                                                                                                    | Yes                     |
| SAE121                    | Admitted following falls, is due to be discharged home with end of life/full time carers. MRI showed chronic subdural haematoma    | Yes (stopped same time) |
| SAE134                    | Seizure, no diagnosis given                                                                                                        | Stopped <28 days ago    |
| SAE218                    | Delirium                                                                                                                           | Yes (stopped same time) |
| SAE219                    | Dementia in Alzheimer's disease                                                                                                    | Yes                     |
| SAE198                    | Confusion, slurred speech, unsteady on feet. Admitted to hospital                                                                  | Yes                     |
| SAE230                    | Patient in acute psychiatric ward on section 2                                                                                     | Yes                     |
| SAE231                    | Suspected stroke. Patient died                                                                                                     | Stopped >28 days ago    |
| SAE239                    | Possible TIA                                                                                                                       | Yes                     |
| SAE247                    | Delirium                                                                                                                           | Yes                     |
| SAE252                    | Progression of Alzheimer's disease – resulted in death                                                                             | Yes (stopped same time) |
| SAE265                    | CVA                                                                                                                                | Yes (stopped same time) |
| <b>Cardio-circulatory</b> |                                                                                                                                    |                         |
| SAE036                    | Suspected myocardial infarction                                                                                                    | Yes                     |
| SAE030                    | Shortness of breath and suspected MI                                                                                               | Yes                     |
| SAE010                    | Cardiac abnormalities: Long QT on ECG and impaired left ventricular function                                                       | Yes                     |
| SAE062                    | Cardiac event – resulted in death                                                                                                  | Yes (stopped same time) |
| SAE035                    | Myocardial infarction                                                                                                              | Yes                     |
| SAE099                    | Syncope attributed to GTN spray overdose (accidental)                                                                              | Yes                     |
| SAE090                    | Swollen ankles, shortness of breath, ambulance called. Admitted to hospital for 11 days. Diagnosis fluid on lungs and heart murmur | Yes                     |
| SAE104                    | Cardiogenic syncope                                                                                                                | Yes                     |
| SAE094                    | Collapsed, thought to be due to low blood pressure                                                                                 | Yes                     |
| SAE098                    | Postural hypotension                                                                                                               | Yes                     |
| SAE201                    | Out of hospital ventricular fibrillation arrest due to anterior myocardial infarction – resulted in death                          | Yes (stopped same time) |
| SAE211                    | Recurrent gradual onset syncope, junctional bradycardia on implantable loop recorder                                               | Yes                     |
| SAE208                    | Postural hypotension                                                                                                               | Yes                     |
| SAE039                    | Hospitalisation - low blood pressure/pulse rate                                                                                    | Yes                     |
| SAE157                    | Hypotension                                                                                                                        | Yes                     |
| SAE125                    | Chest pain                                                                                                                         | Yes                     |
| SAE049                    | Suspected heart attack resulting in death                                                                                          | Yes (stopped same time) |
| SAE137                    | Severe mitral valve regurgitation, which resolved upon rate-limiting control of AF and LV improvement in function                  | Yes                     |
| SAE144                    | Currently unknown – heart related problems                                                                                         | Yes                     |
| SAE151                    | Death from MI                                                                                                                      | Yes (stopped same time) |
| SAE168                    | Death – coronary atherosclerosis hypertension                                                                                      | Yes (stopped same time) |
| SAE171                    | Cardiac arrest                                                                                                                     | Yes                     |
| SAE207                    | Heart problems. Cardiac monitor had revealed that heart had stopped for short time                                                 | Yes                     |
| SAE202                    | Heart failure                                                                                                                      | Stopped <28 days ago    |
| SAE205                    | Heart failure                                                                                                                      | Stopped <28 days ago    |
| SAE176                    | Aortic stenosis                                                                                                                    | Yes                     |
| SAE103                    | Deterioration in cardiac failure plus syncopal episode lead to hospital admission                                                  | Yes (stopped same time) |
| SAE224                    | Heart failure – resulted in death                                                                                                  | Stopped >28 days ago    |

|                  |                                                                              |                         |
|------------------|------------------------------------------------------------------------------|-------------------------|
| SAE241           | Heart attack – resulted in death                                             | Stopped >28 days ago    |
| SAE240           | Labile blood pressure/hypertension                                           | Yes                     |
| SAE246           | Heart failure                                                                | Yes                     |
| SAE248           | Heart attack – resulted in death                                             | Yes (stopped same time) |
| SAE564           | Syncope (due to likely bradycardia)                                          | Stopped >28 days ago    |
| SAE268           | Atrial fibrillation                                                          | Stopped >28 days ago    |
| <b>Renal</b>     |                                                                              |                         |
| SAE057           | Kidney stones                                                                | Yes                     |
| SAE058           | Large abdominal tumour causing kidney failure – resulted in death            | Never started           |
| SAE084           | Chronic renal failure – resulted in death                                    | Stopped >28 days ago    |
| SAE101           | No evidence of bladder cancer. Pt was having tests from a bladder biopsy.    | Yes                     |
| SAE113           | Radical left nephrectomy laparoscopy                                         | Stopped >28 days ago    |
| SAE204           | Acute kidney injury                                                          | Yes                     |
| SAE267           | Lung and kidney failure – resulted in death                                  | Stopped >28 days ago    |
| <b>Infection</b> |                                                                              |                         |
| SAE014           | Hospitalisation – chest infection                                            | Yes                     |
| SAE017           | Hospitalisation – delirium due to dehydration & urine infection              | Yes                     |
| SAE044           | Probable UTI, symptoms of confusion, weakness, low mobility                  | Yes                     |
| SAE082           | Infection following a foreign body in arm                                    | Yes                     |
| SAE051           | Chest infection                                                              | Yes (stopped same time) |
| SAE052           | Urinary tract infection                                                      | Yes (stopped same time) |
| SAE081           | Catheter associated UTI                                                      | Yes (stopped same time) |
| SAE070           | Chest infection                                                              | Yes                     |
| SAE097           | Infection – resulted in death                                                | Stopped >28 days ago    |
| SAE100           | Pruritic rash in the context of urosepsis                                    | Yes                     |
| SAE107           | Urosepsis                                                                    | Yes                     |
| SAE115           | Sepsis, possibly related to gall bladder problems                            | Stopped >28 days ago    |
| SAE131           | Progressive decline post chest infection                                     | Stopped >28 days ago    |
| SAE127           | Urinary infection                                                            | Stopped <28 days ago    |
| SAE141           | Admitted with lower respiratory infection                                    | Yes (stopped same time) |
| SAE165           | Patient admitted to hospital with very sore throat later diagnosed as thrush | Yes                     |
| SAE173           | Shortness of breath and chest infection                                      | Yes                     |
| SAE174           | Shortness of breath and chest infection                                      | Yes                     |
| SAE180           | Taken to hospital with very low blood pressure and infection                 | Yes                     |
| SAE188           | Sepsis                                                                       | Stopped >28 days ago    |
| SAE195           | 11/11/16 Wife reports participant has chest infection – resulted in death    | Yes (stopped same time) |
| SAE197           | Urinary tract infection                                                      | Yes                     |
| SAE133           | Updated from discharge summary: Cellulitis                                   | Stopped >28 days ago    |
| SAE233           | UTI                                                                          | Stopped >28 days ago    |
| SAE234           | UTI                                                                          | Stopped >28 days ago    |
| SAE210           | Urinary tract infection, confusion                                           | Yes                     |
| SAE216           | Oesophageal candidiasis                                                      | Yes                     |
| SAE213           | Admitted with lower respiratory tract infection                              | Stopped >28 days ago    |
| SAE22            | UTI                                                                          | Yes                     |
| SAE223           | UTI                                                                          | Yes                     |
| <b>Other</b>     |                                                                              |                         |
| SAE006           | Hospitalisation – collapsed in street                                        | Yes                     |
| SAE028           | Suspected blood clot in legs. Swollen legs/painful. No blood clot found      | Yes                     |



|        |                                                                                                                                                                                                   |                         |
|--------|---------------------------------------------------------------------------------------------------------------------------------------------------------------------------------------------------|-------------------------|
| SAE033 | Suspected thrombosis – investigations complete no diagnosis of thrombosis. Symptoms of swollen legs have been associated with previously known water condition. Symptoms reduced after treatment. | Yes                     |
| SAE042 | Participant drank white spirit in error                                                                                                                                                           | Yes                     |
| SAE071 | Replacement of left knee                                                                                                                                                                          | Stopped >28 days ago    |
| SAE111 | Sensitivity and tenderness around left nipple                                                                                                                                                     | Yes                     |
| SAE074 | IMP overdose                                                                                                                                                                                      | Yes                     |
| SAE089 | Patient collapsed following accidental overdose of ranitidine                                                                                                                                     | Yes (stopped same time) |
| SAE108 | General health decline– resulted in death. Pt was in respite care.                                                                                                                                | Stopped >28 days ago    |
| SAE148 | Osteoarthritis                                                                                                                                                                                    | Yes                     |
| SAE179 | Jaw, back and neck pain – no diagnosis – cardiac problems ruled out                                                                                                                               | Stopped >28 days ago    |
| SAE162 | Prolonged hospital stay after planned hernia operation                                                                                                                                            | Yes                     |
| SAE186 | Admitted for elective abdominal hysterectomy and bilateral salpingo-oophorectomy                                                                                                                  | Yes                     |
| SAE178 | No acute medical problem identified. Pt felt as if she had severe indigestion. Investigations into whether it was a mild heart attack in A&E (stayed overnight). No explanation found.            | Stopped >28 days ago    |
| SAE185 | (TURP) Transurethral resection of the prostate                                                                                                                                                    | Yes                     |
| SAE214 | Hip screw being removed                                                                                                                                                                           | Yes                     |
| SAE225 |                                                                                                                                                                                                   | Yes                     |
| SAE244 | Post op – scrotal oedema                                                                                                                                                                          | Yes                     |
| SAE242 | Swollen legs                                                                                                                                                                                      | Yes                     |
| SAE250 | Unknown – resulted in death                                                                                                                                                                       | >28 days ago            |

\* Participants can have more than one recorded SAE in each category

**eTable 5B. Serious Adverse Events categorised by treatment allocation and whether on treatment (IMP)**

| SAE class                 | Counts of SAEs reported |           |           |           |           |           |            |           |
|---------------------------|-------------------------|-----------|-----------|-----------|-----------|-----------|------------|-----------|
|                           | 400mg                   |           | 200mg     |           | Placebo   |           | Total      |           |
|                           | On IMP                  | OFF IMP   | On IMP    | OFF IMP   | On IMP    | OFF IMP   | On IMP     | OFF IMP   |
| Gastrointestinal          | 2                       | 1         | 7         | 1         | 4         | 6         | 13         | 8         |
| Respiratory               | 6                       | 2         | 6         | 2         | 9         | 1         | 21         | 5         |
| Mechanical injury         | 4                       | 2         | 9         | 2         | 11        | 2         | 24         | 6         |
| Endocrine and metabolic   | 1                       | 1         | 1         | 0         | 7         | 2         | 9          | 3         |
| Cancer                    | 8                       | 4         | 2         | 1         | 9         | 2         | 19         | 7         |
| Haematological/thrombosis | 3                       | 0         | 1         | 0         | 2         | 0         | 6          | 0         |
| Dermatological            | 0                       | 0         | 1         | 0         | 0         | 0         | 1          | 0         |
| Neuropsychiatric          | 9                       | 1         | 8         | 5         | 15        | 1         | 32         | 7         |
| Cardio-circulatory        | 10                      | 4         | 8         | 1         | 10        | 1         | 28         | 6         |
| Renal                     | 1                       | 2         | 1         | 1         | 1         | 1         | 3          | 4         |
| Infection                 | 5                       | 5         | 0         | 1         | 16        | 3         | 21         | 9         |
| Other                     | 5                       | 2         | 8         | 3         | 2         | 0         | 15         | 5         |
| <b>Total</b>              | <b>54</b>               | <b>24</b> | <b>52</b> | <b>17</b> | <b>86</b> | <b>19</b> | <b>192</b> | <b>60</b> |
