# Supplementary material for: Minocycline at 2 Different Dosages vs Placebo for Patients With Mild Alzheimer Disease: A Randomized Clinical Trial
Source: PubMed Central journal article supplement (PMC6865324; doi:10.1001/jamaneurol.2019.3762), 2019-11-18
Supplement: jamaneurol-77-164-s003.pdf [file jamaneurol-77-164-s003.pdf]

## Data Sharing Statement

Howard. Minocycline at 2 Different Dosages vs Placebo for Patients With Mild Alzheimer Disease. *JAMA Neurol*. Published November 18, 2019. 10.1001/jamaneurol.2019.3762

### Data

**Data available:** Yes

**Data types:** Deidentified participant data

**How to access data:** [robert.howard@ucl.ac.uk](mailto:robert.howard@ucl.ac.uk)

**When available:** With publication

### Supporting Documents

**Document types:** None

### Additional Information

**Who can access the data:** Researchers whose proposed use of the data has been approved.

**Types of analyses:** For meta-analyses or any analyses of the data approved by the Trial Steering Committee.

**Mechanisms of data availability:** With investigator support.
